# Supplementary material
Source: Royal Society of Chemistry journal article supplement (doi:10.1039/d6fo00178e)
Supplement: d6fo00178e2.pdf [file d6fo00178e2.pdf]

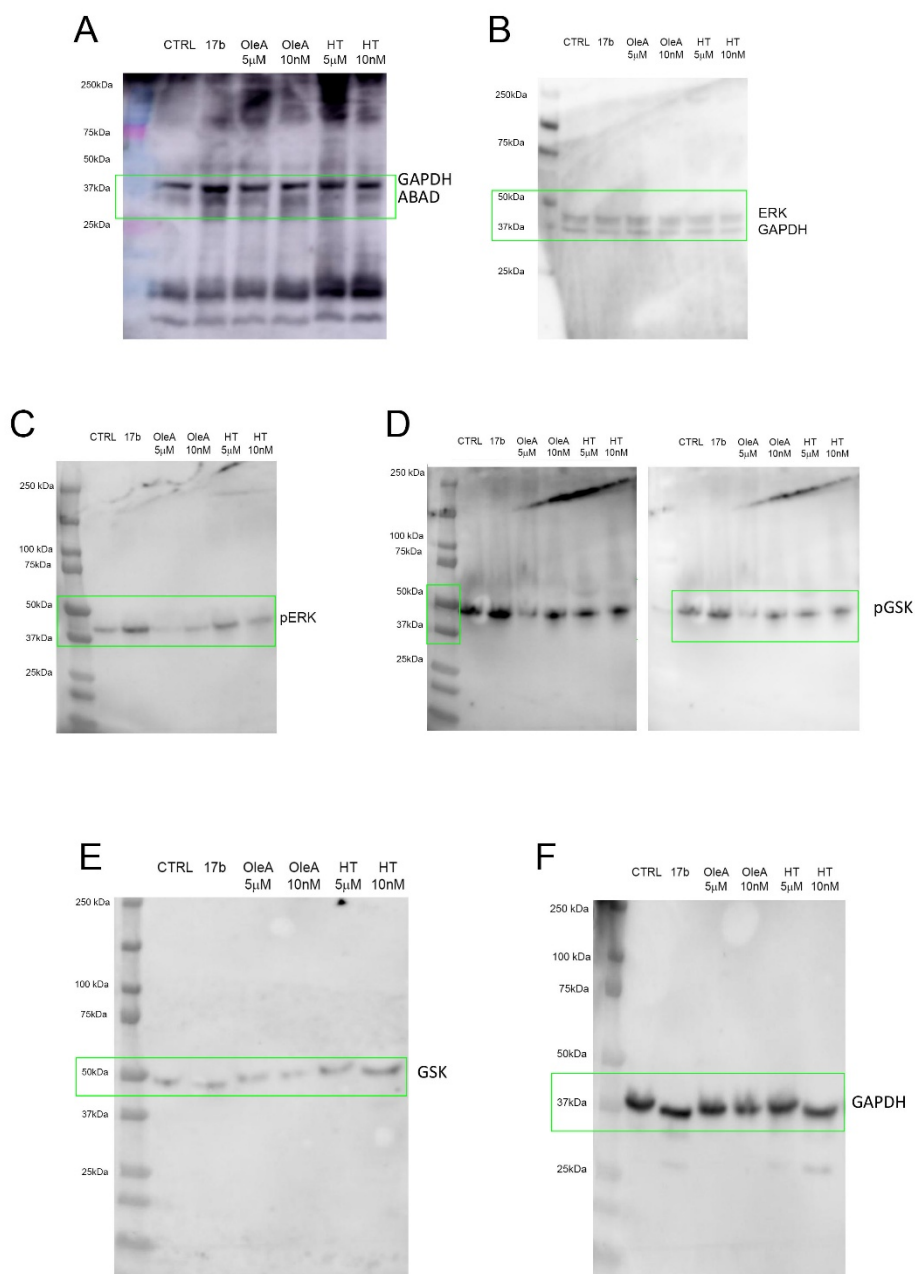

**Supplementary Fig.1S. Representative full-length Western blot gels analyzed.** (A) Full-length gel of the blot cropped in Figure 7 for ABAD, as indicated by the green rectangle. (B–F) Full-length gels of blots cropped, as indicated by the green rectangle, and shown in Figure 4. (D) Two green rectangles correspond to signal saturation required to visualize the molecular weight markers from the standard. In Figure 4, the merged image between the two green rectangles one for the molecular weight (saturated signal) and the non-saturated pGSK3 $\beta$  signal ( used for quantification) is shown.
