# Supplementary material
Source: Royal Society of Chemistry journal article supplement (doi:10.1039/d6fo00178e)
Supplement: d6fo00178e3.pdf [file d6fo00178e3.pdf]

**Table S1**

For each treatment, Euclidean distances in the score space have been computed between the CTRL and the treatment groups (OleA 10 nM, OleA 5 μM, HT 10 nM, HT 5 μM, 17b). A t-test with multiple comparison correction (Bonferroni) was performed to assess whether the distance for each group differs significantly from 0.

|         | HT10nM | HT5uM  | Ole10nM | Ole5uM | 17b    |
|---------|--------|--------|---------|--------|--------|
| p-value | <1e-16 | <1e-16 | <1e-16  | <1e-16 | <1e-16 |

**Table S2**

An unbalanced one-way ANOVA (A) followed by pairwise comparisons with Tukey's multiple comparison correction (B) was performed on Euclidean distances computed in the LDA score space to compare the treatment groups (OleA 10 nM, OleA 5 μM, HT 10 nM, HT 5 μM, 17b) among each other's.

**A. one-way ANOVA**

|        | Df | Sum of Sq. | F-value | Pr(>F)   | significance |
|--------|----|------------|---------|----------|--------------|
| groups | 4  | 59         | 6.939   | 1.47e-05 | ***          |

**B. Tukey's multiple comparison correction**

| comparison           | estimate    | p adjusted | significance |
|----------------------|-------------|------------|--------------|
| HT_5uM-HT_10nM       | 0.15848135  | 0.3510470  |              |
| OLE_10nM-HT_10nM     | -0.24298344 | 0.0306251  | *            |
| OLE_5uM-HT_10nM      | -0.12234990 | 0.6009367  |              |
| X17BETA_10nM-HT_10nM | 0.05362785  | 0.9535602  |              |
| OLE_10nM-HT_5uM      | -0.40146478 | 0.0000325  | ***          |
| OLE_5uM-HT_5uM       | -0.28083125 | 0.0114257  | *            |
| 17b_10nM-HT_5uM      | -0.10485350 | 0.6622607  |              |
| OLE_5uM-OLE_10nM     | 0.12063354  | 0.6140931  |              |
| 17b_10nM-OLE_10nM    | 0.29661128  | 0.0007775  | ***          |
| 17b_10nM-OLE_5uM     | 0.17597775  | 0.1447645  |              |
